# Supplementary material for: Environmental Impact on Harmful Species Pseudo-nitzschia spp. and Phaeocystis globosa Phenology and Niche
Source: MDPI journal article supplement (doi:10.3390/jmse10020174), 2022-01-27

# Point 1 Dunkerque

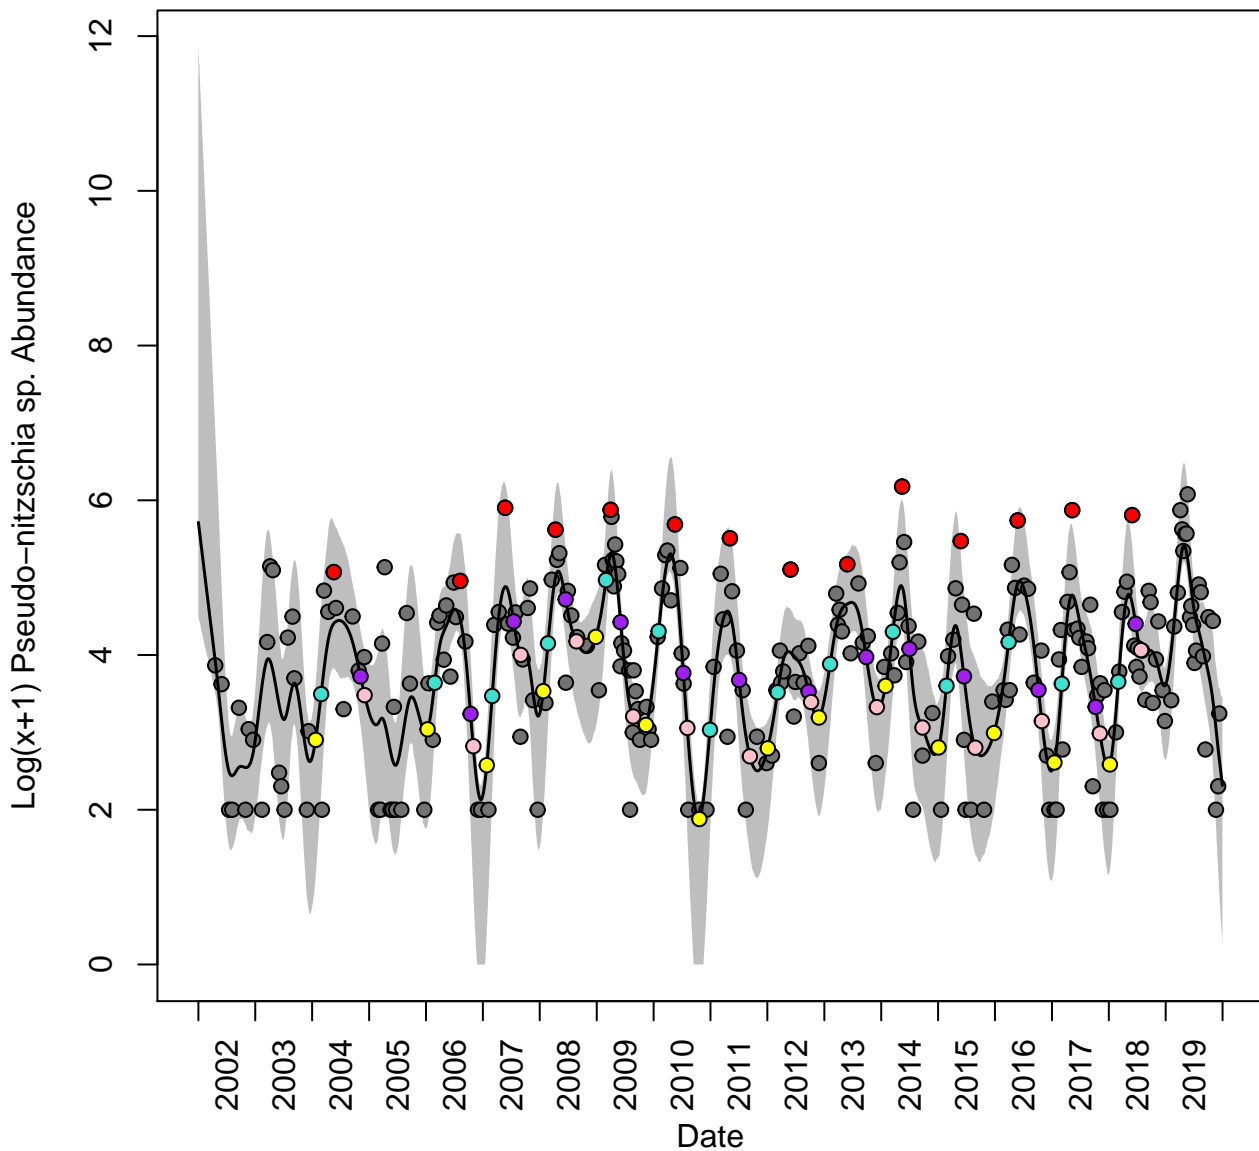

# Point 3 SRN Dunkerque

Log(x+1) Pseudo-nitzschia sp. Abundance

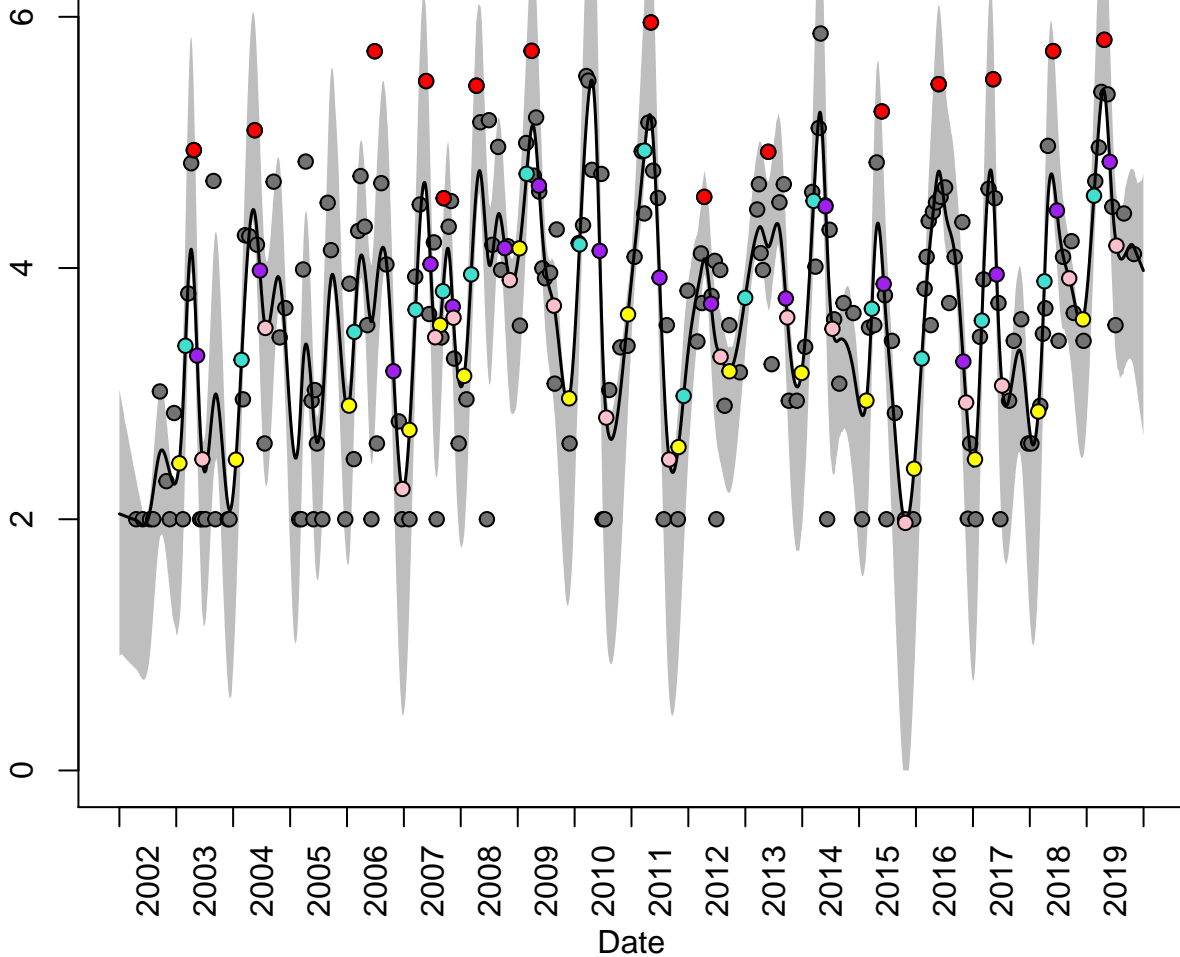

## Point 4 SRN Dunkerque

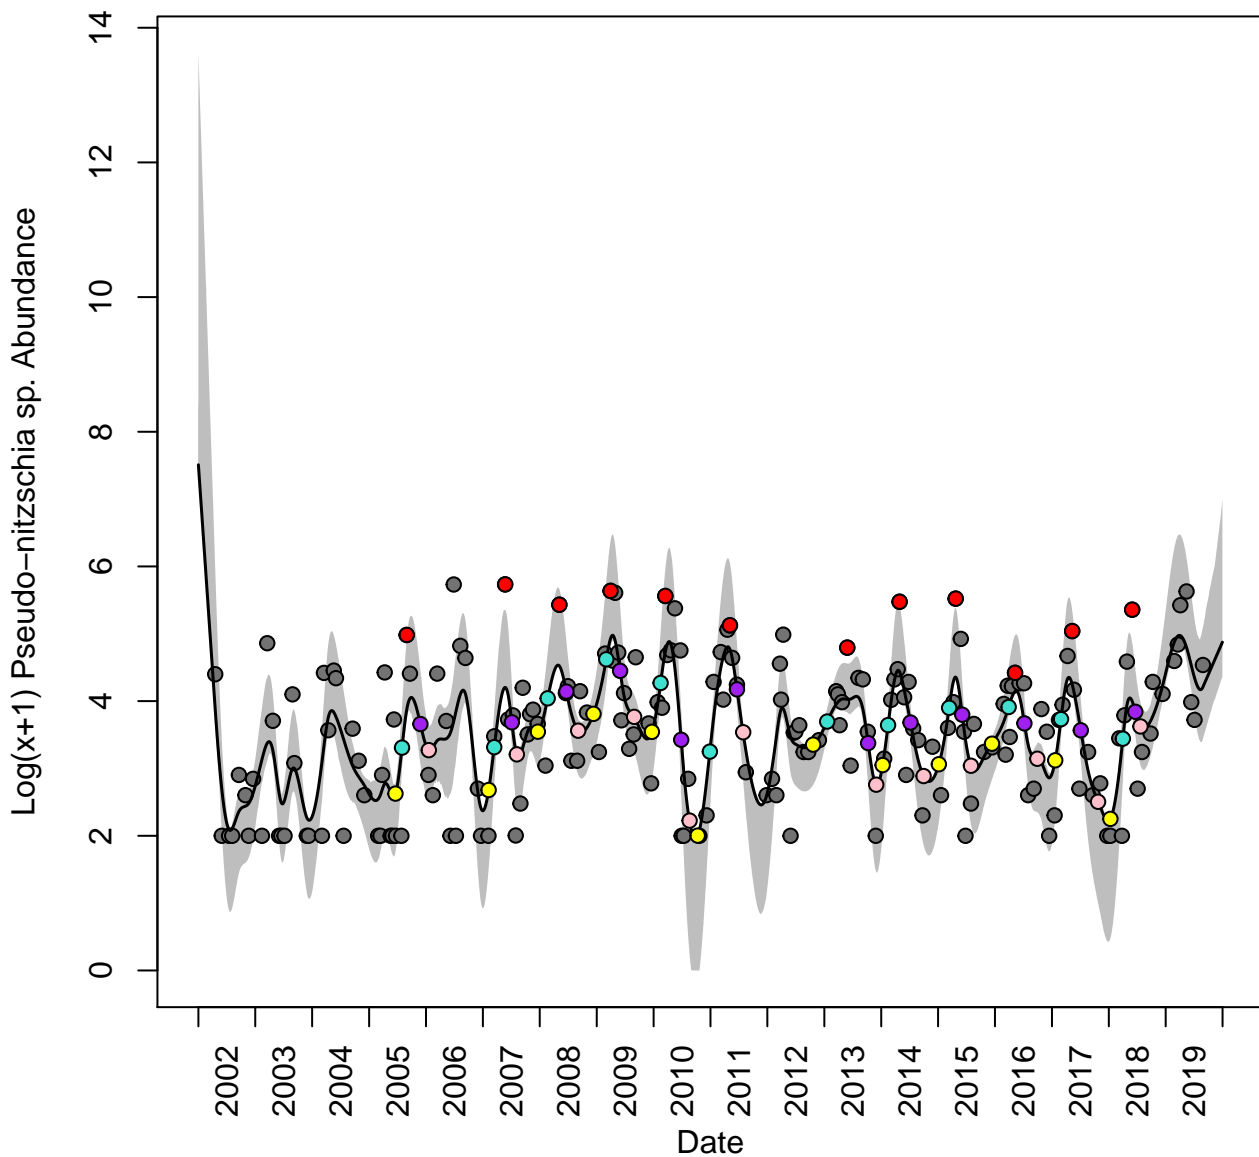

# Point 1 Boulogne

Log(x+1) Pseudo-nitzschia sp. Abundance

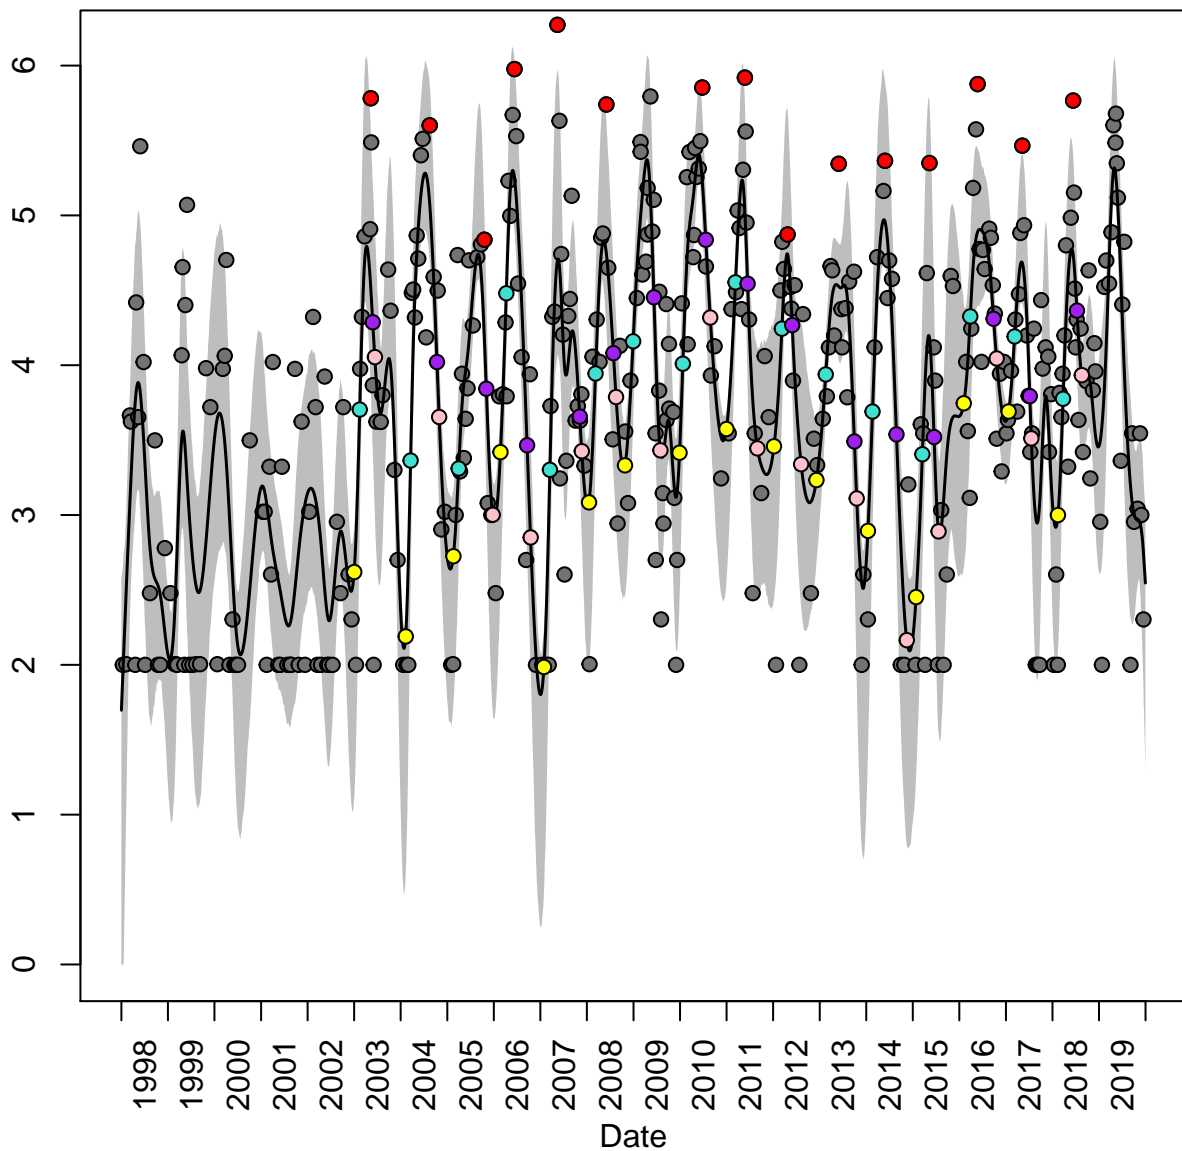

# Point 2 SRN Boulogne

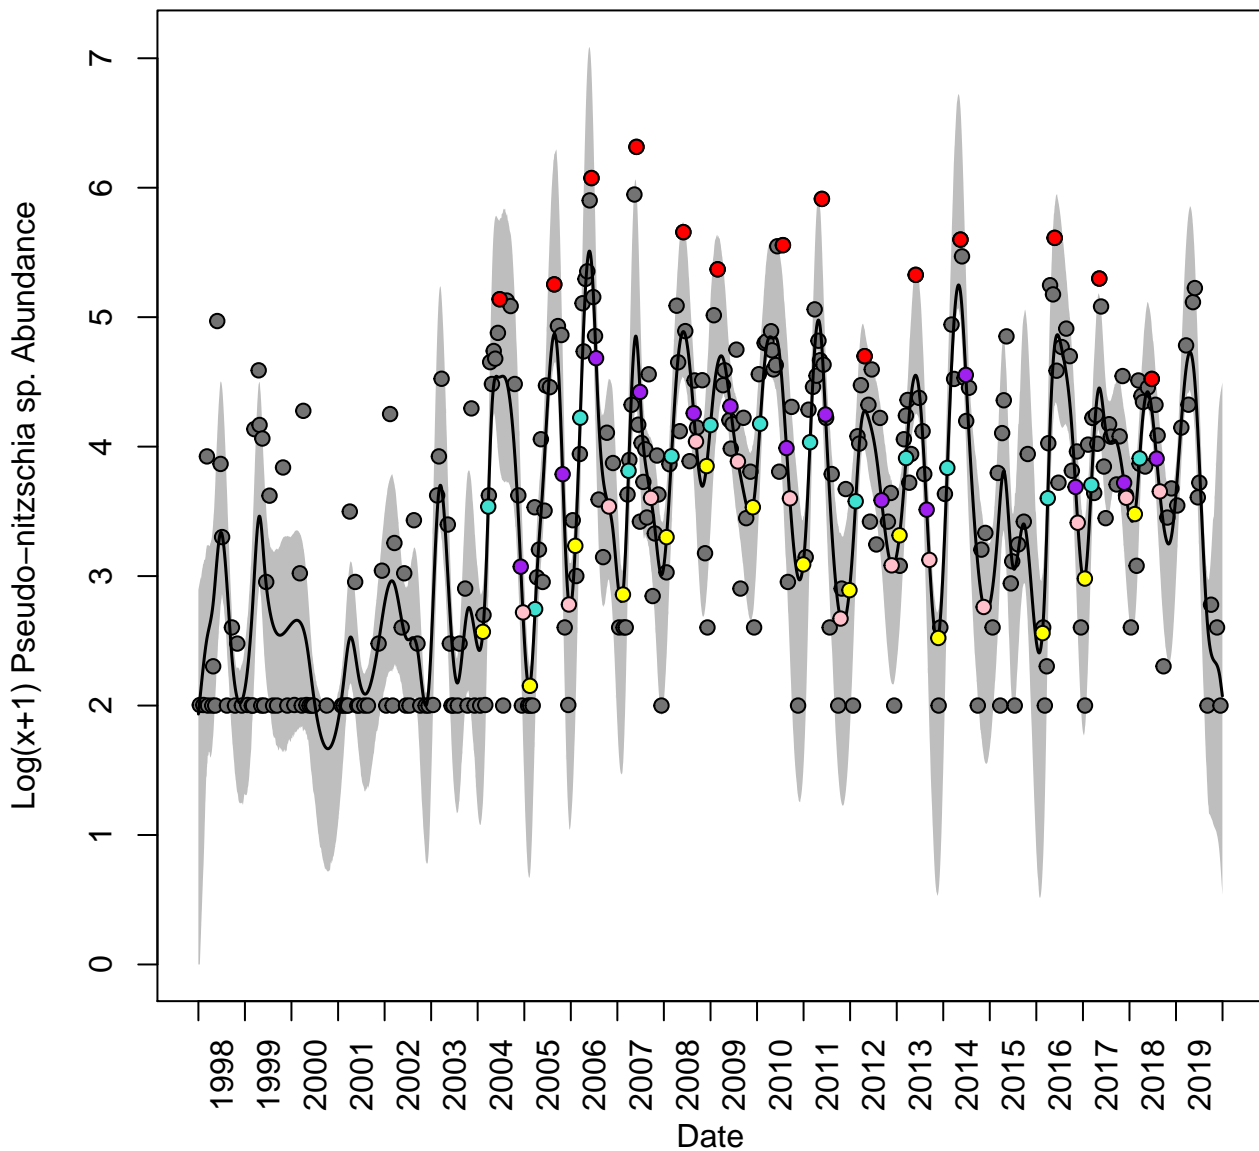

# Point 3 SRN Boulogne

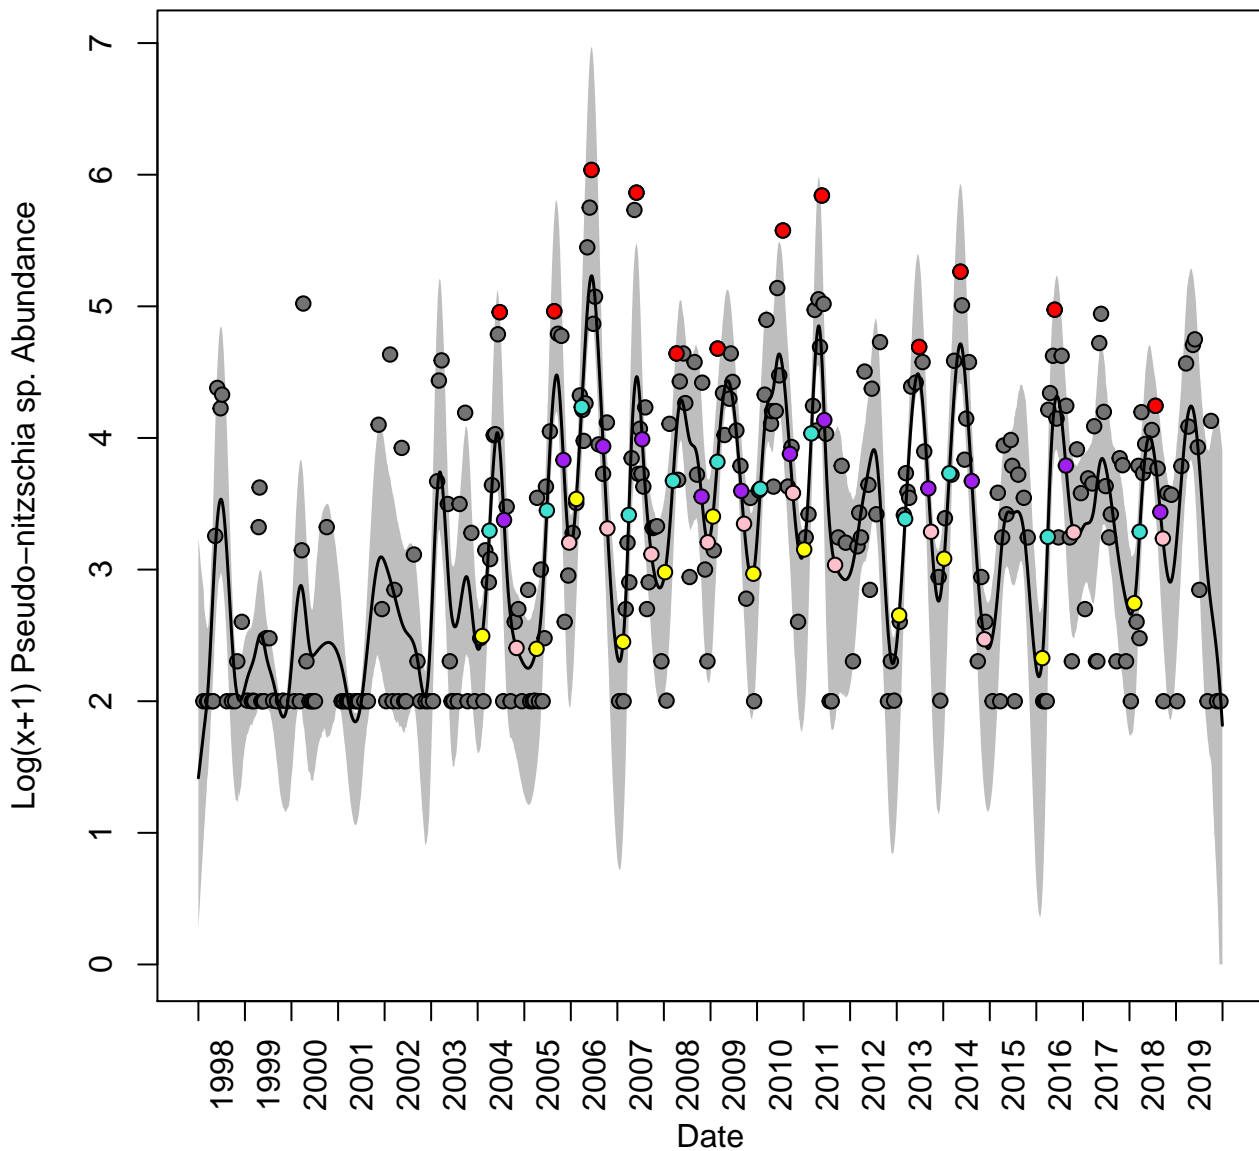

# SRN Somme mer 1

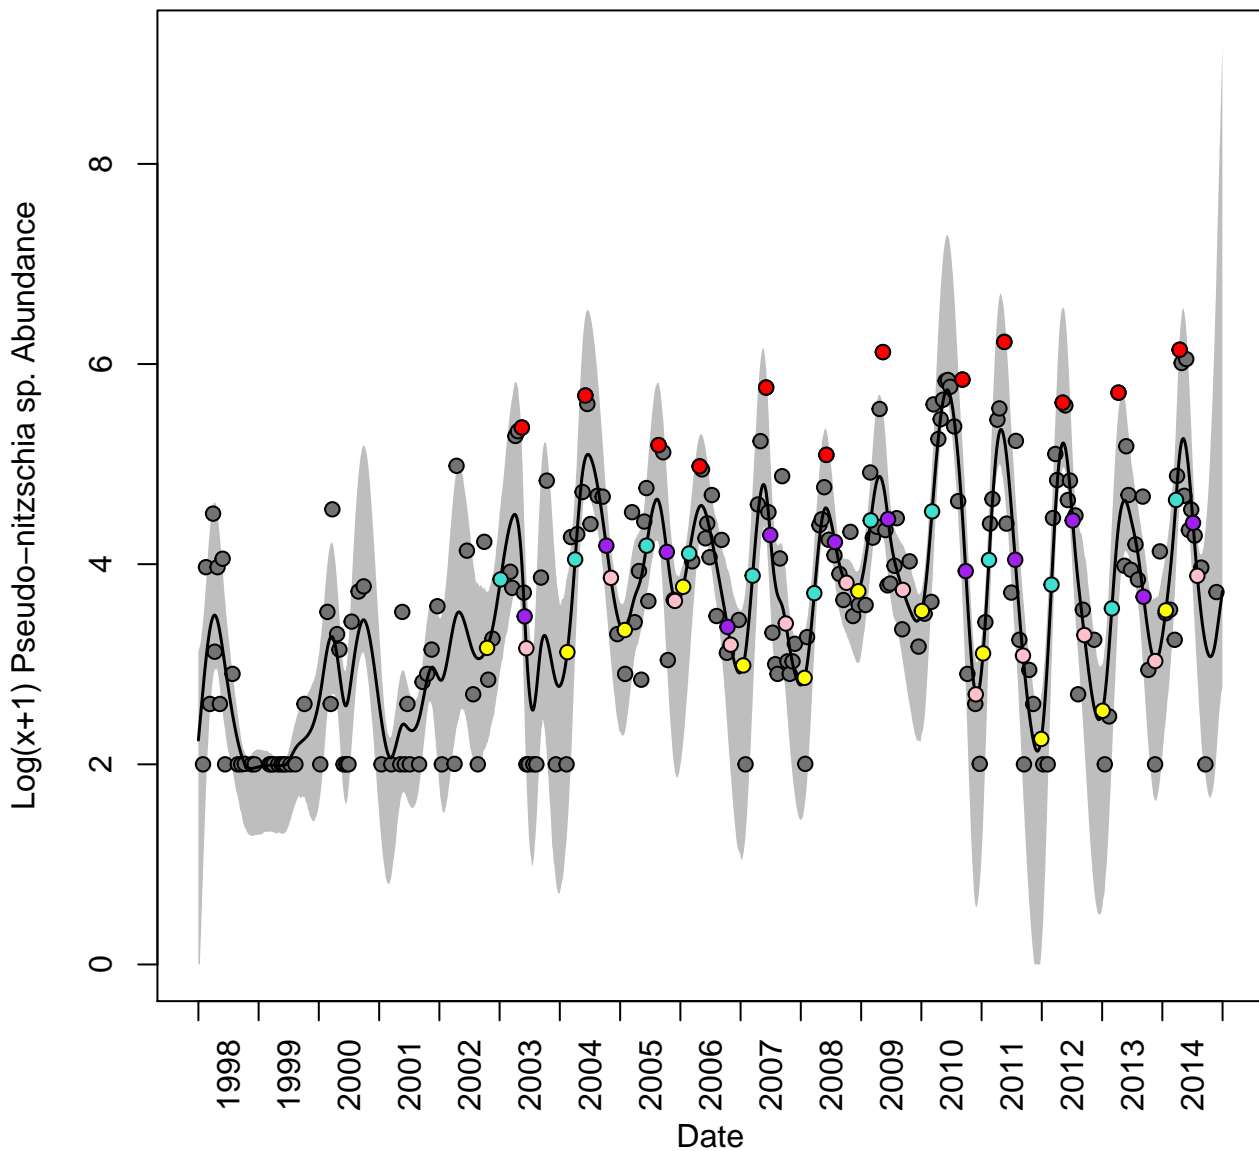

## SRN Somme mer 2

Log(x+1) Pseudo-nitzschia sp. Abundance

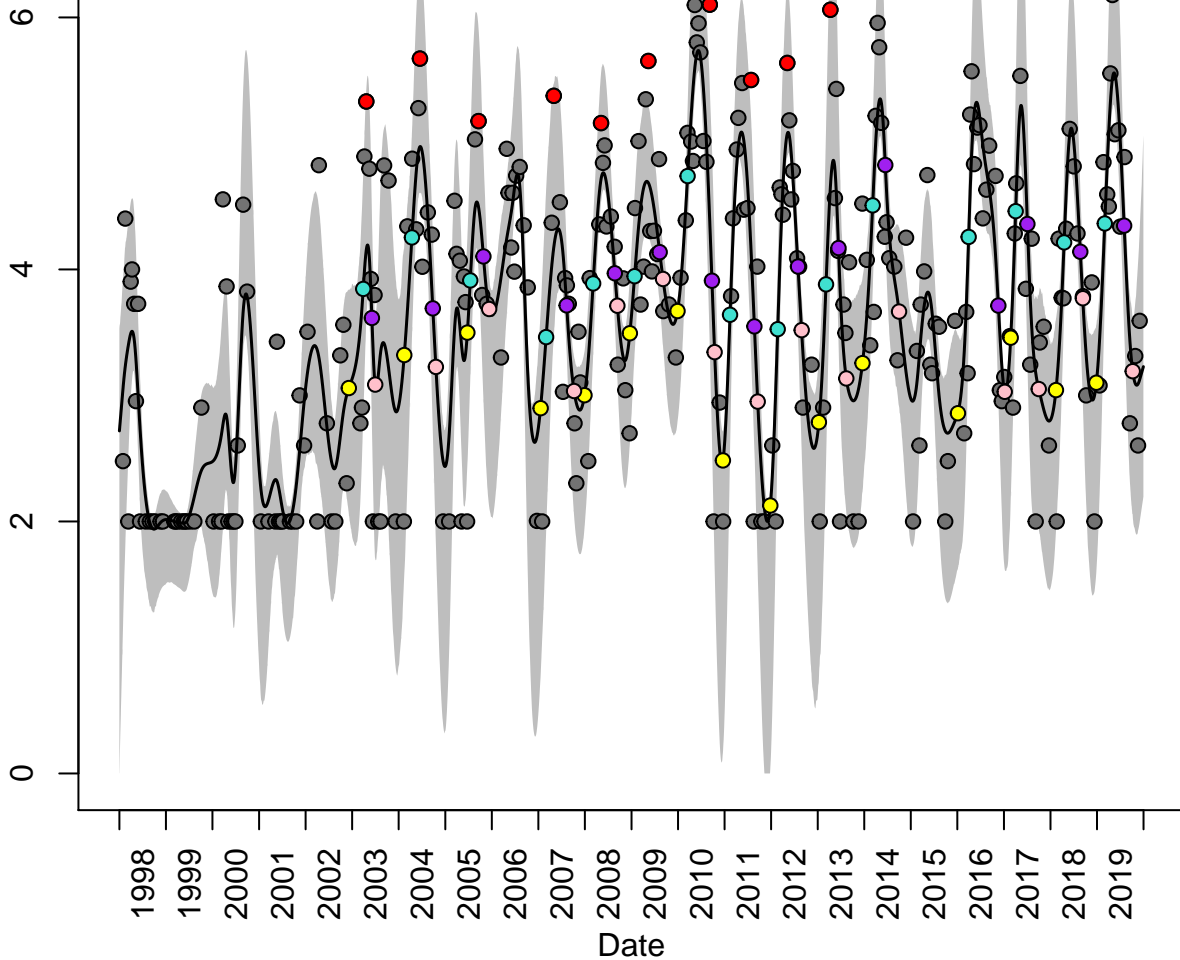



At so

Log(x+1) Pseudo-nitzschia sp. Abundance

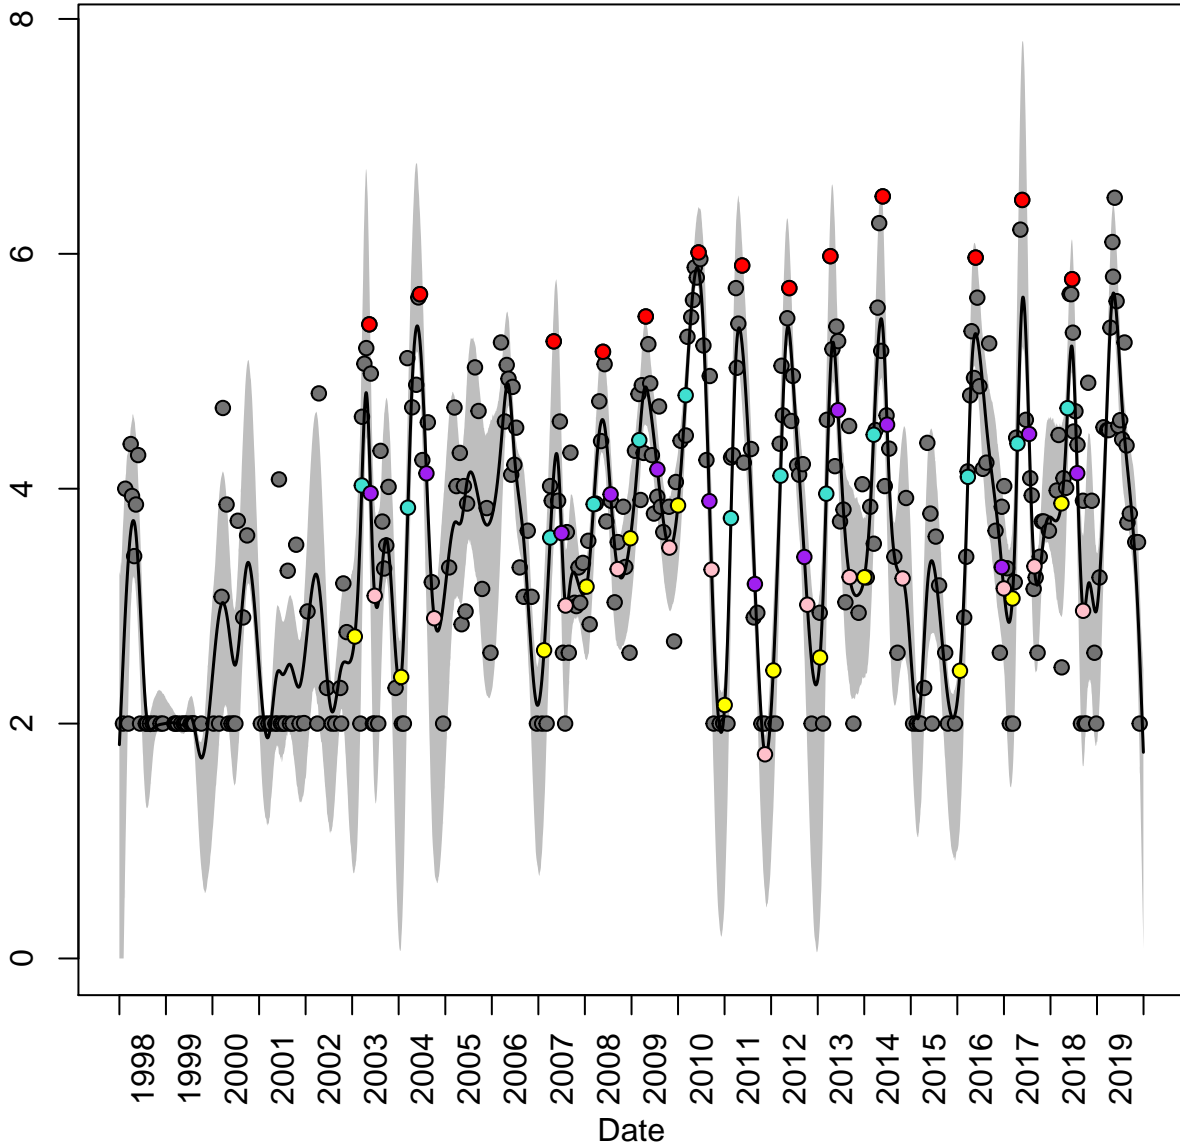

# Mimer

Log(x+1) Pseudo-nitzschia sp. Abundance

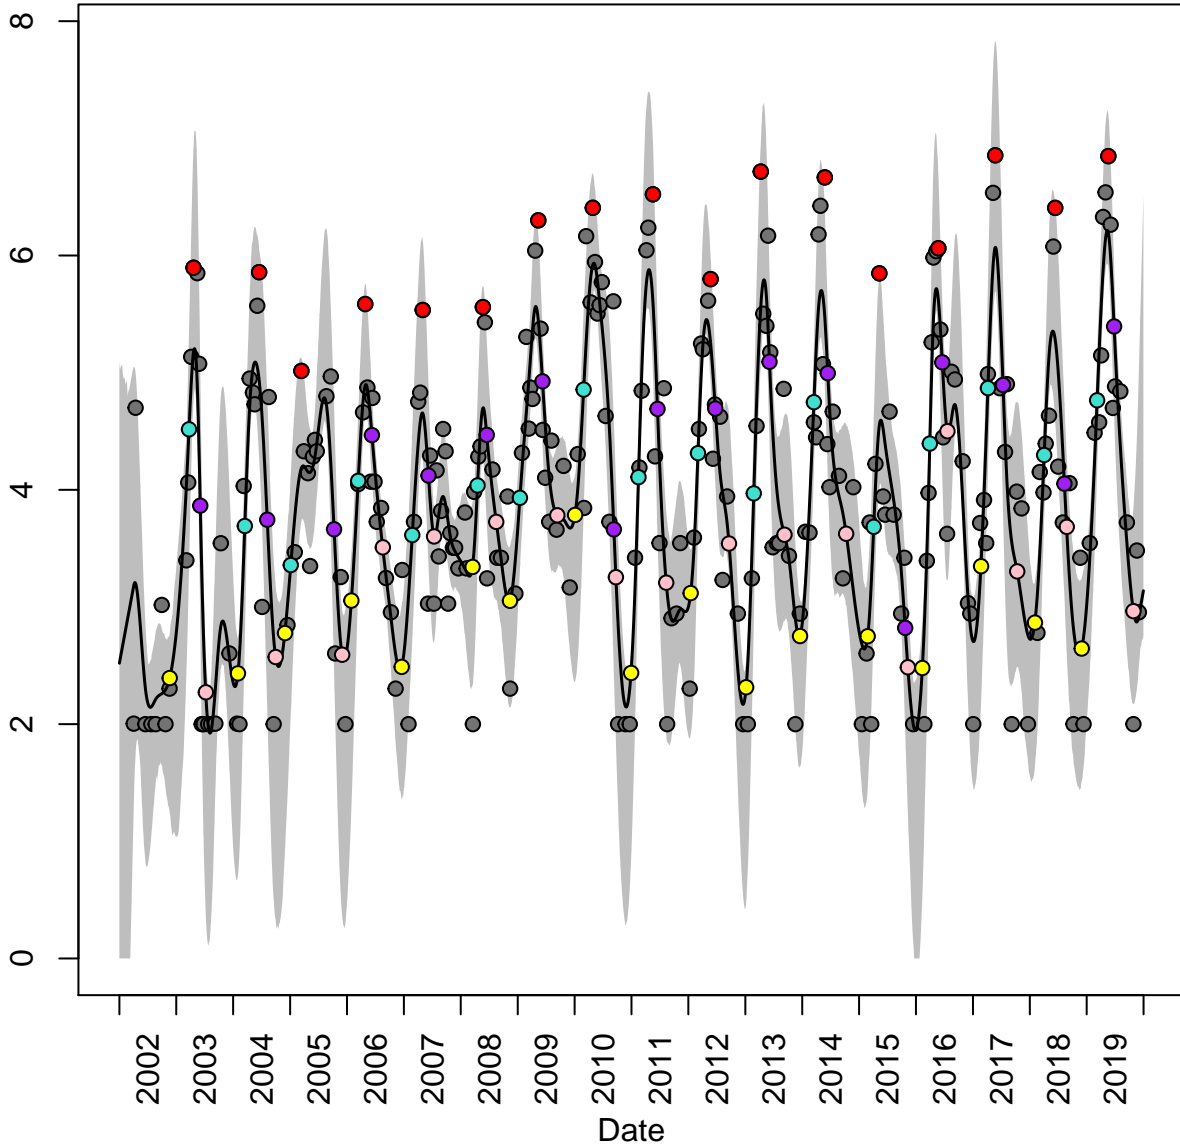

# Bif

Log(x+1) Pseudo-nitzschia sp. Abundance

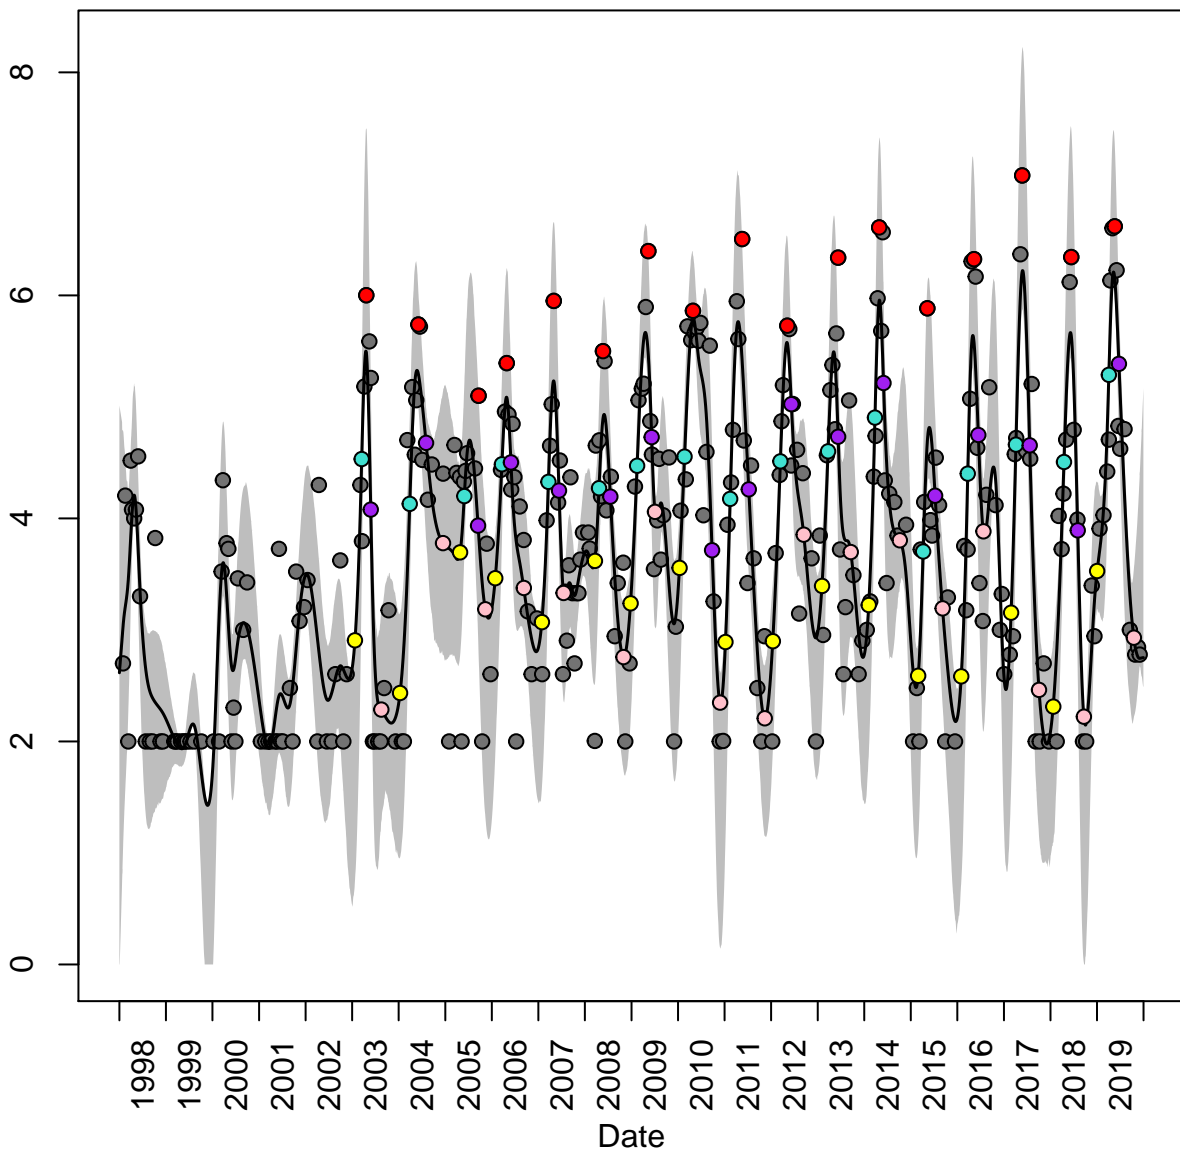

Supplement: s1 [file s1]
