# Supplementary material for: Environmental Impact on Harmful Species Pseudo-nitzschia spp. and Phaeocystis globosa Phenology and Niche
Source: MDPI journal article supplement (doi:10.3390/jmse10020174), 2022-01-27

## Point 1 Dunkerque

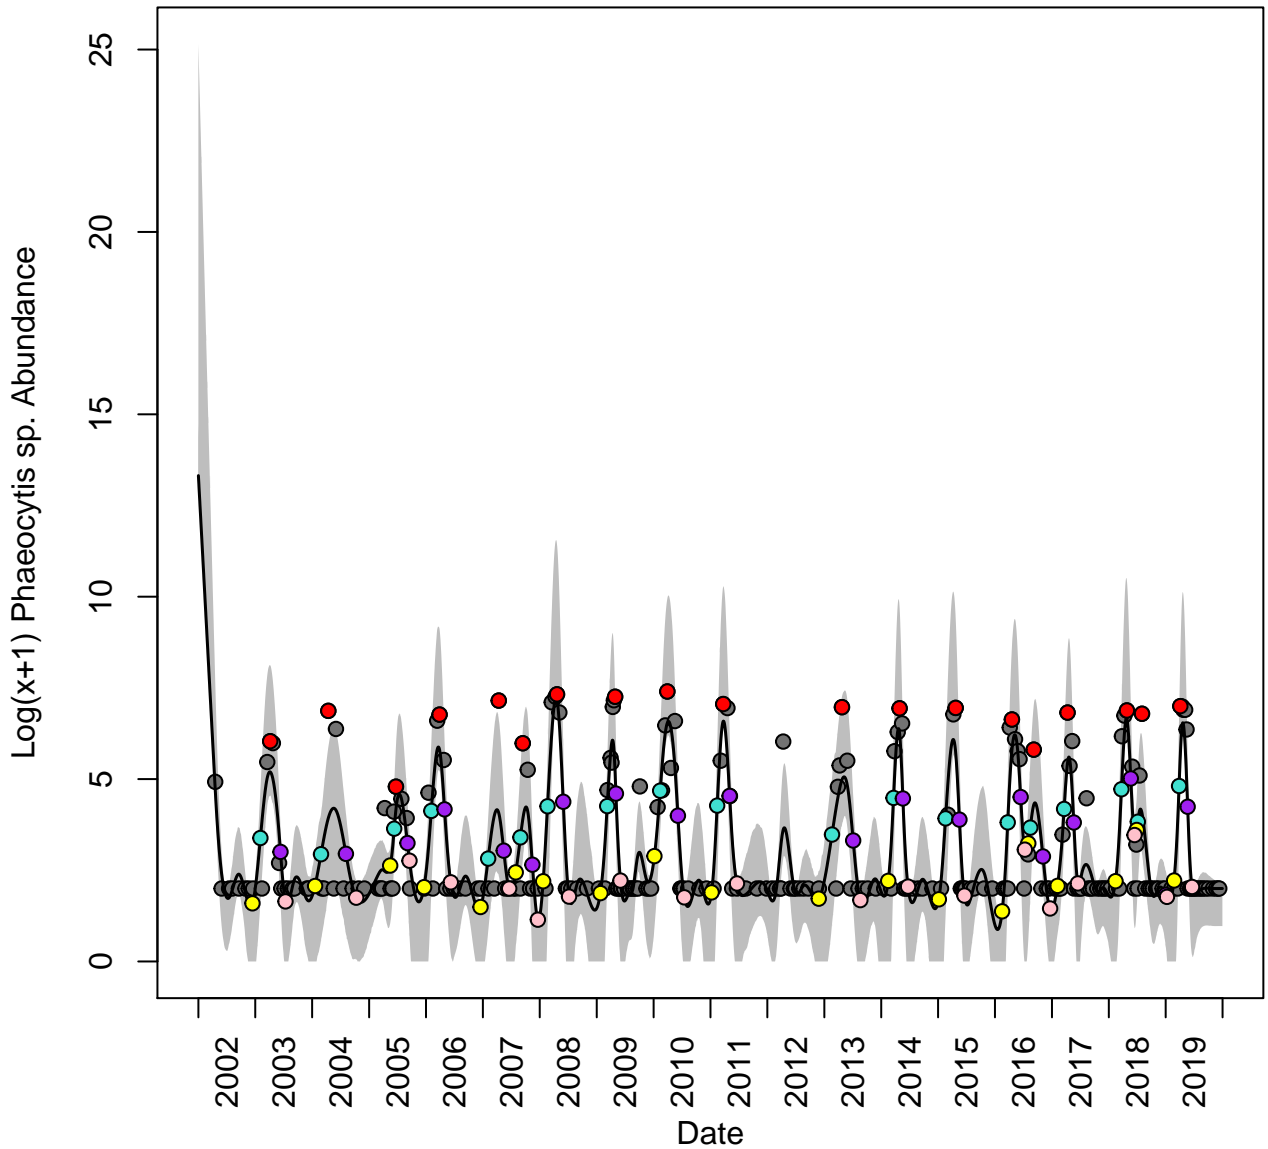

# Point 3 SRN Dunkerque

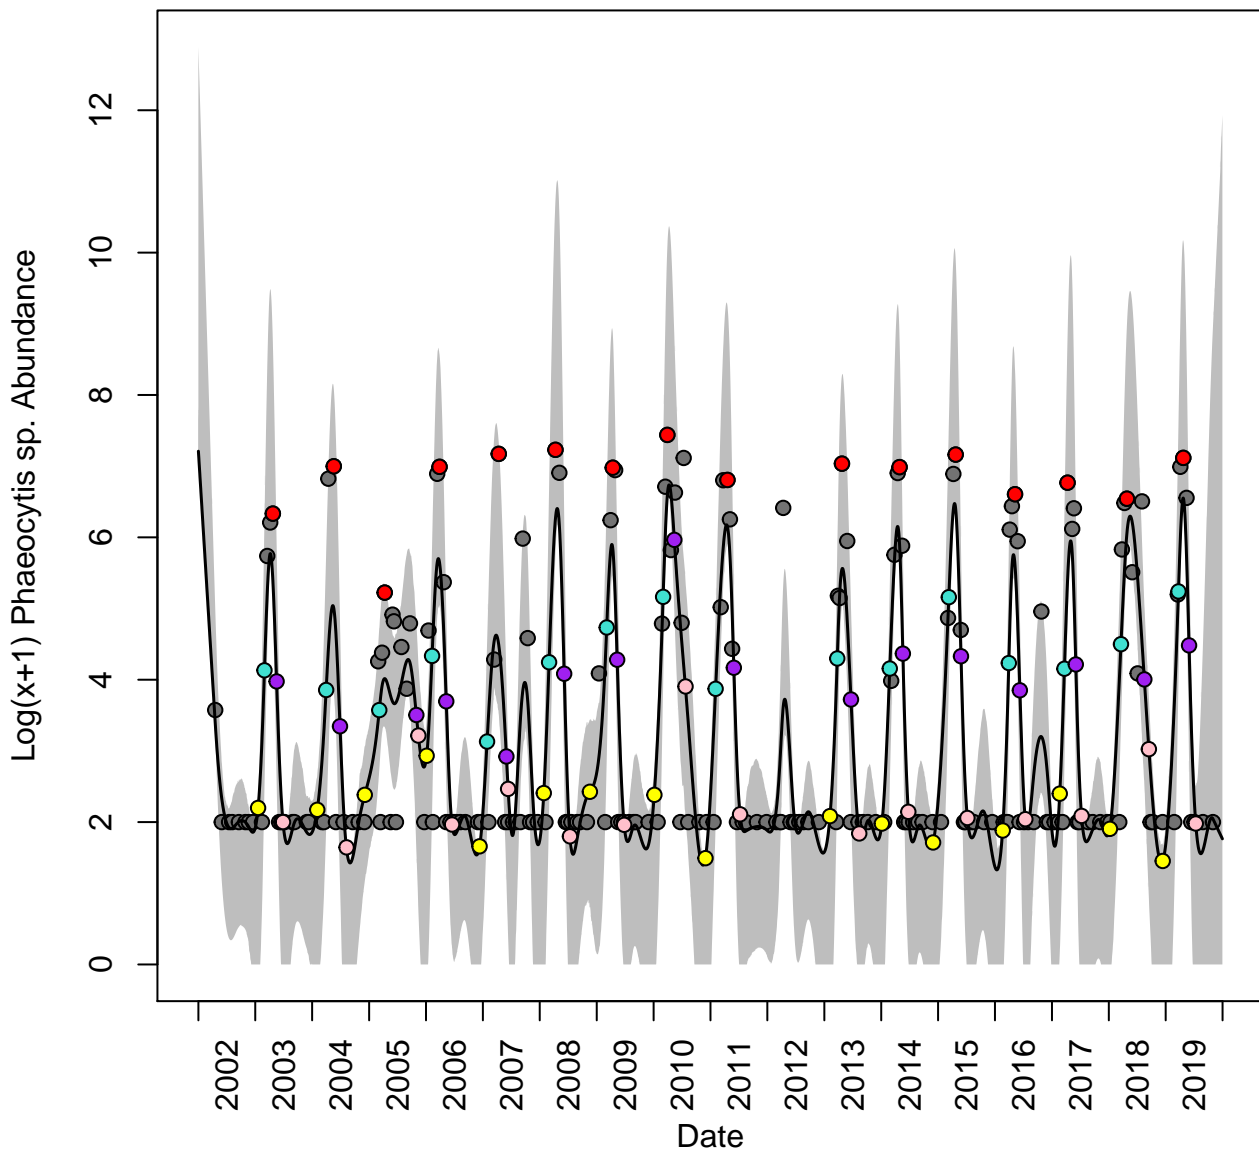

## Point 4 SRN Dunkerque

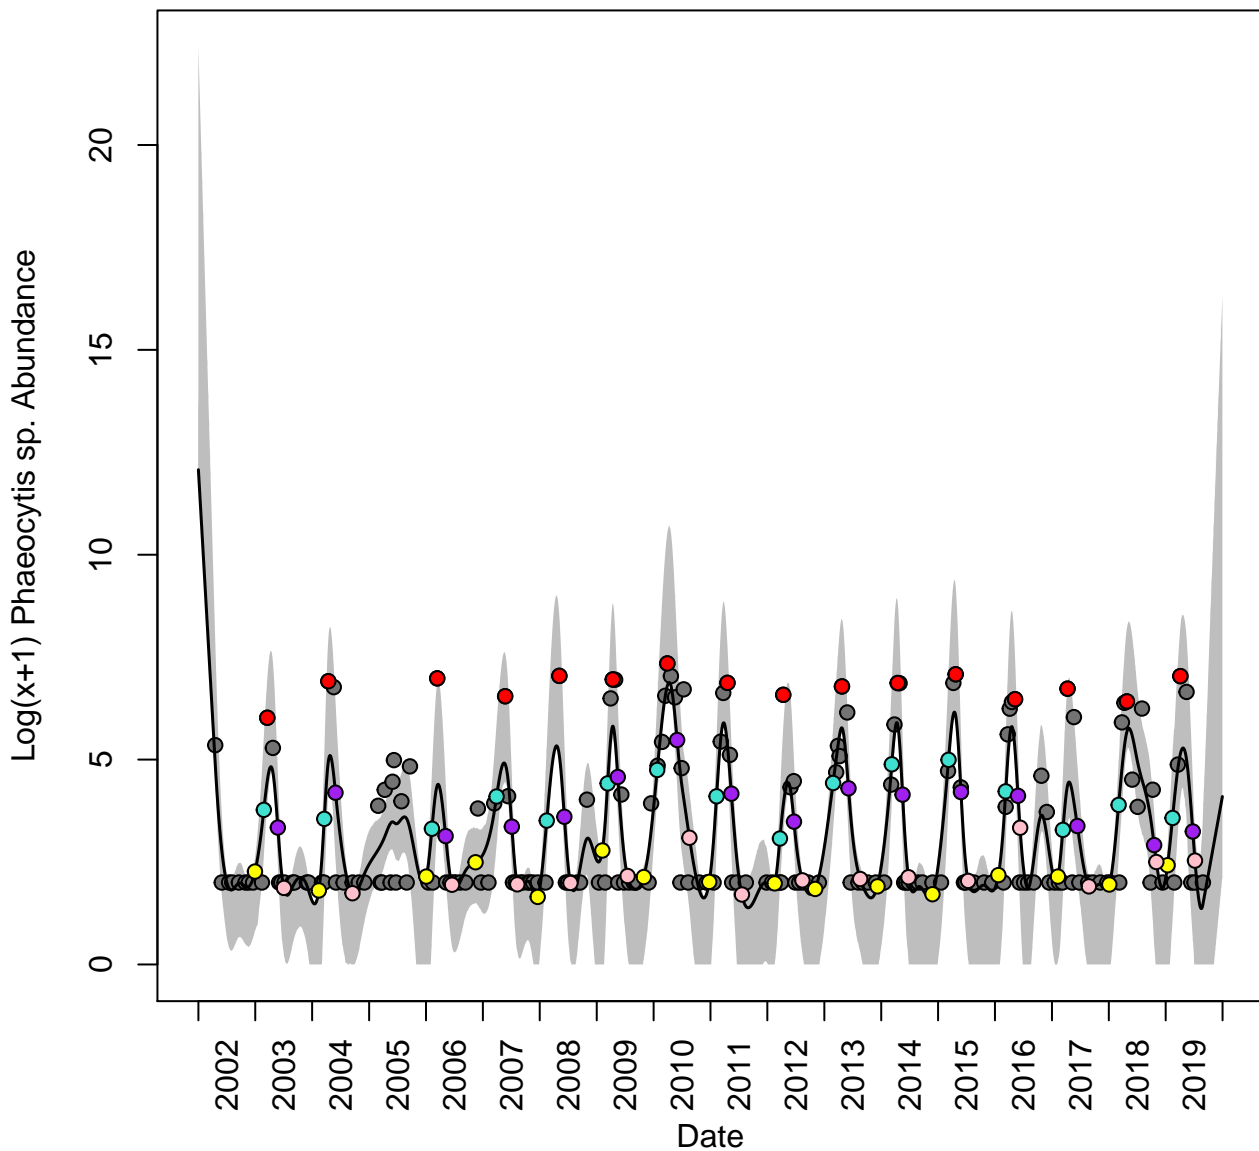

# Point 1 Boulogne

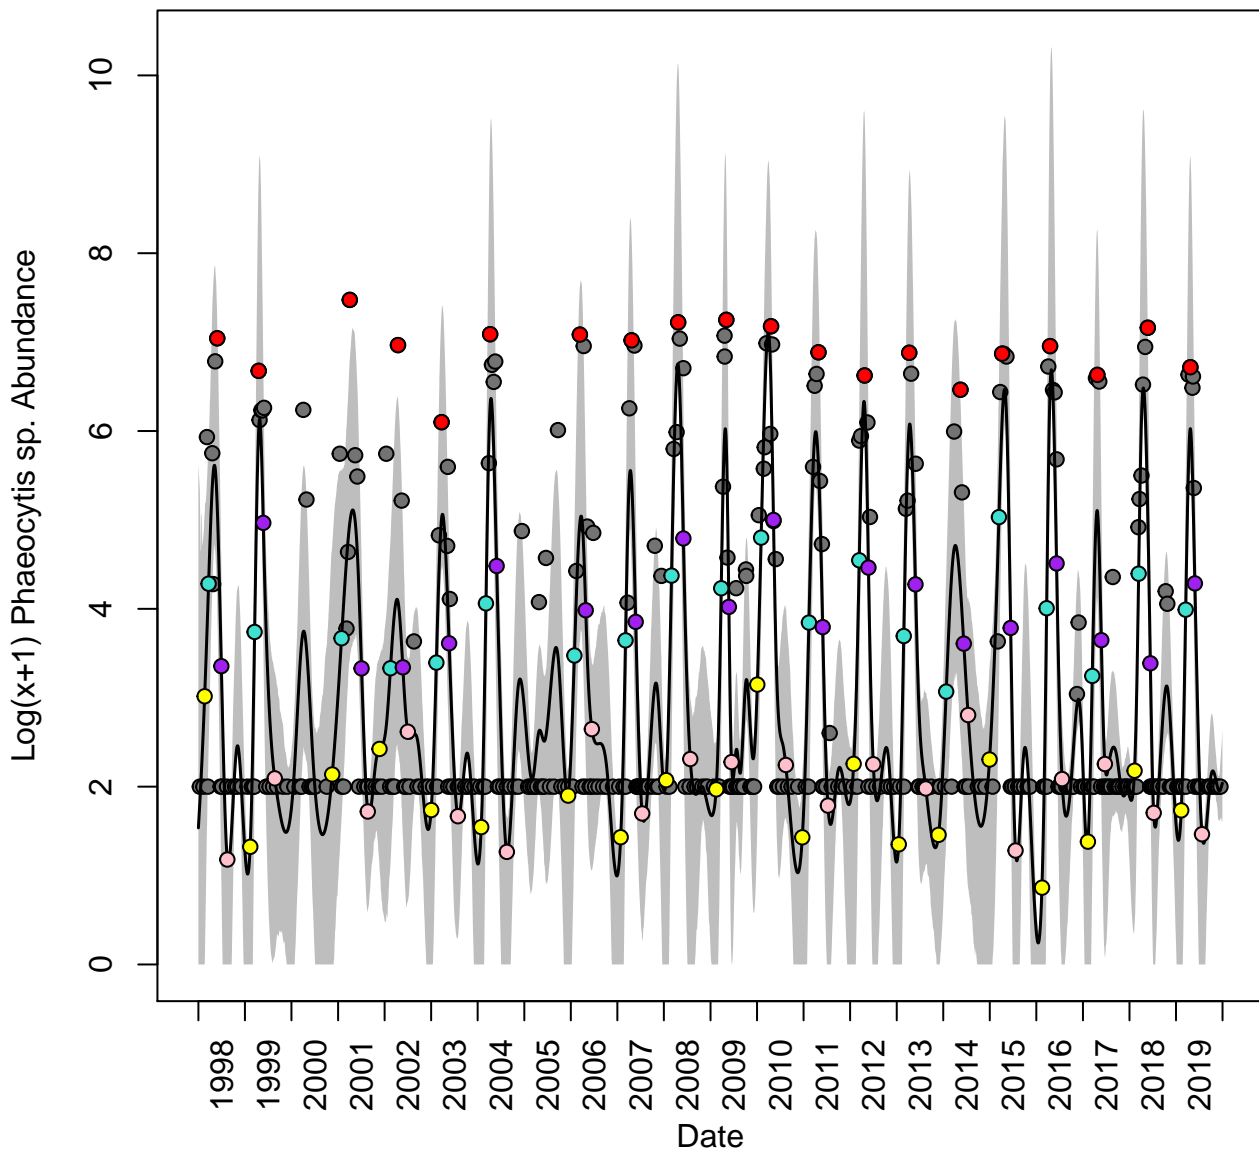

## Point 2 SRN Boulogne

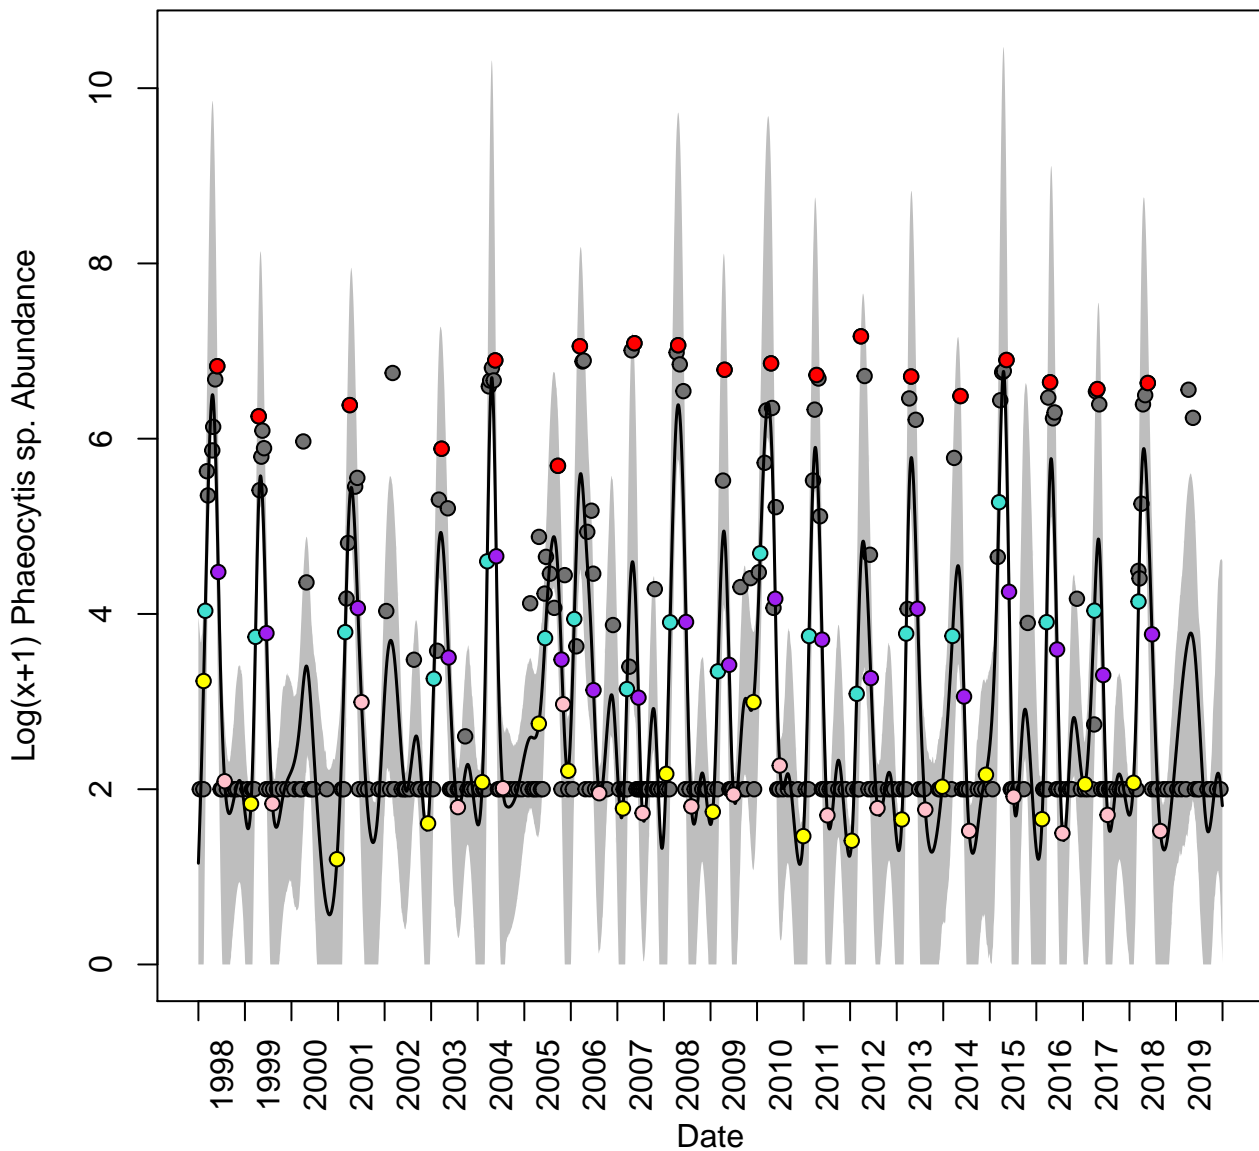

# Point 3 SRN Boulogne

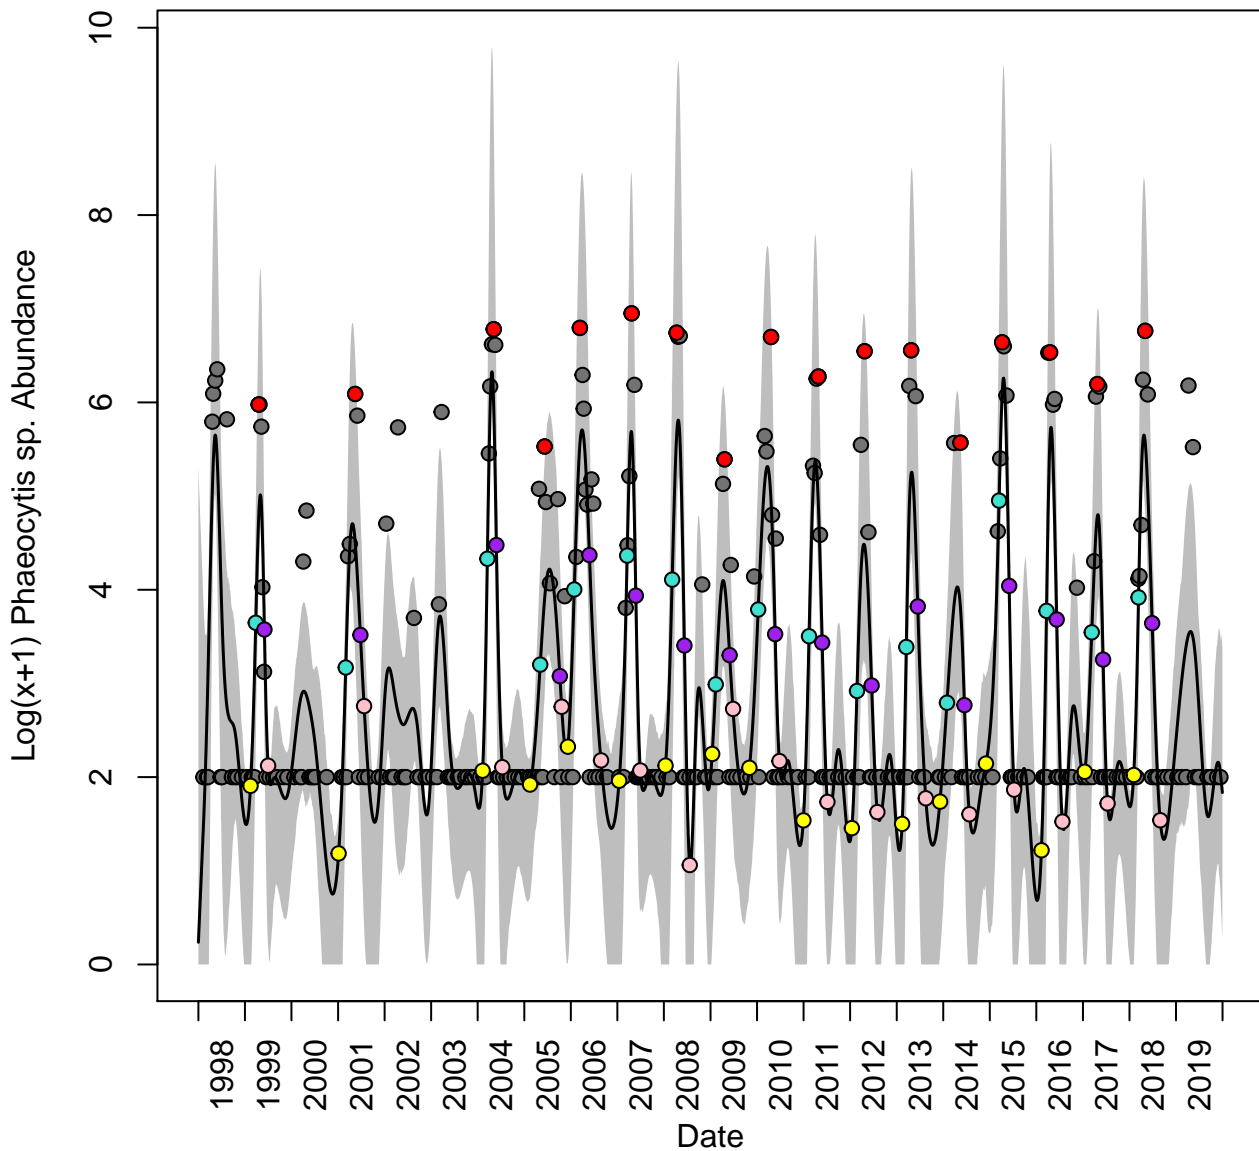

# SRN Somme mer 1

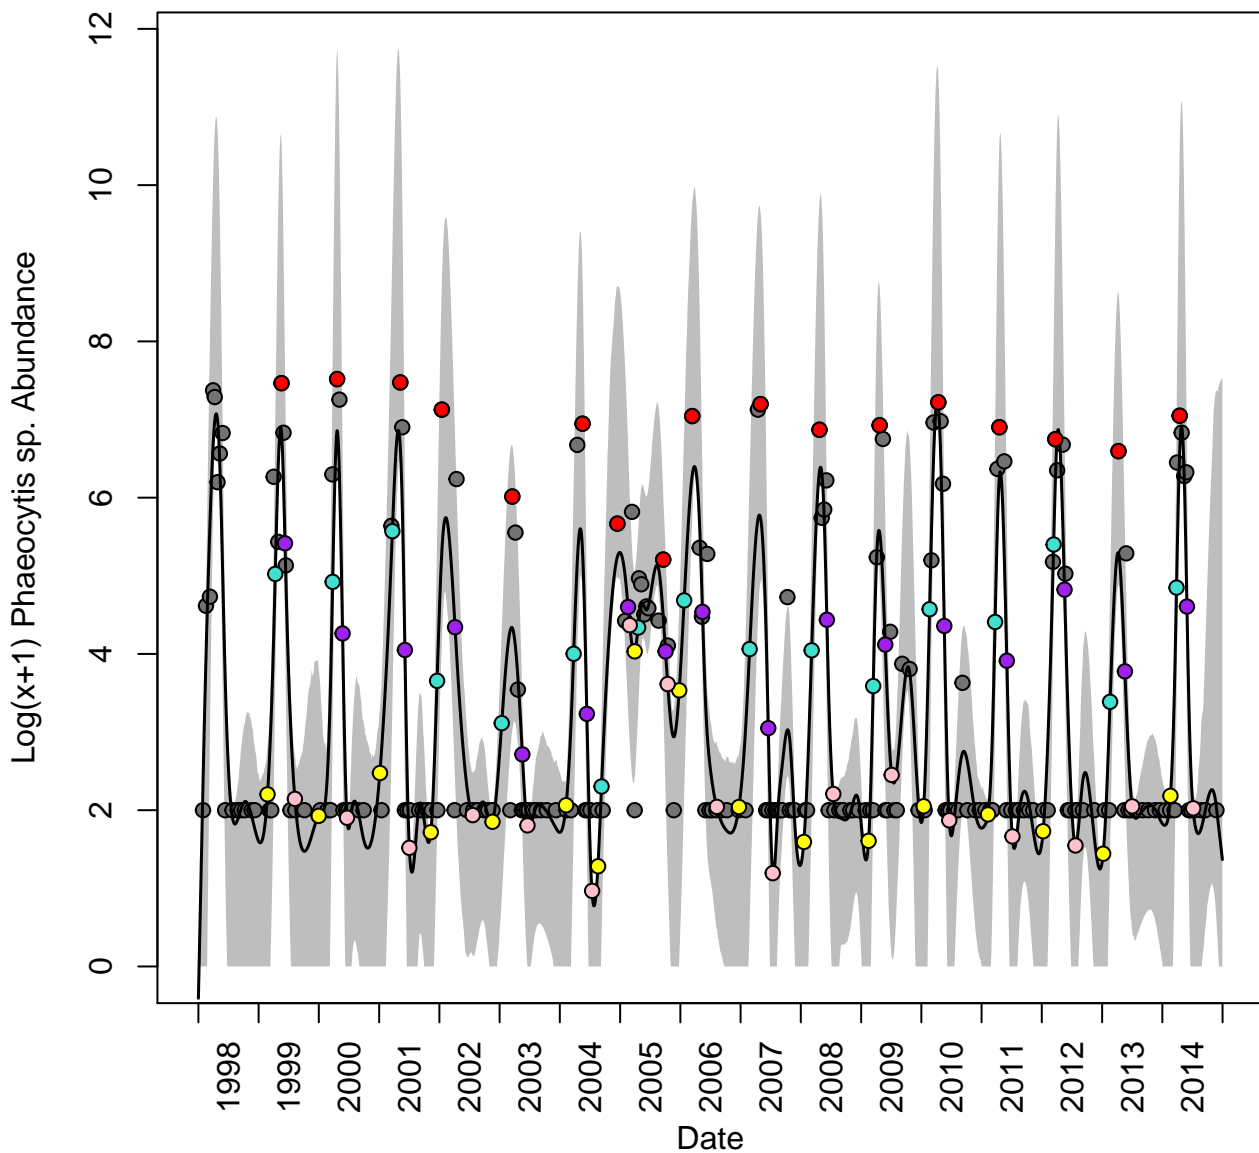

## SRN Somme mer 2

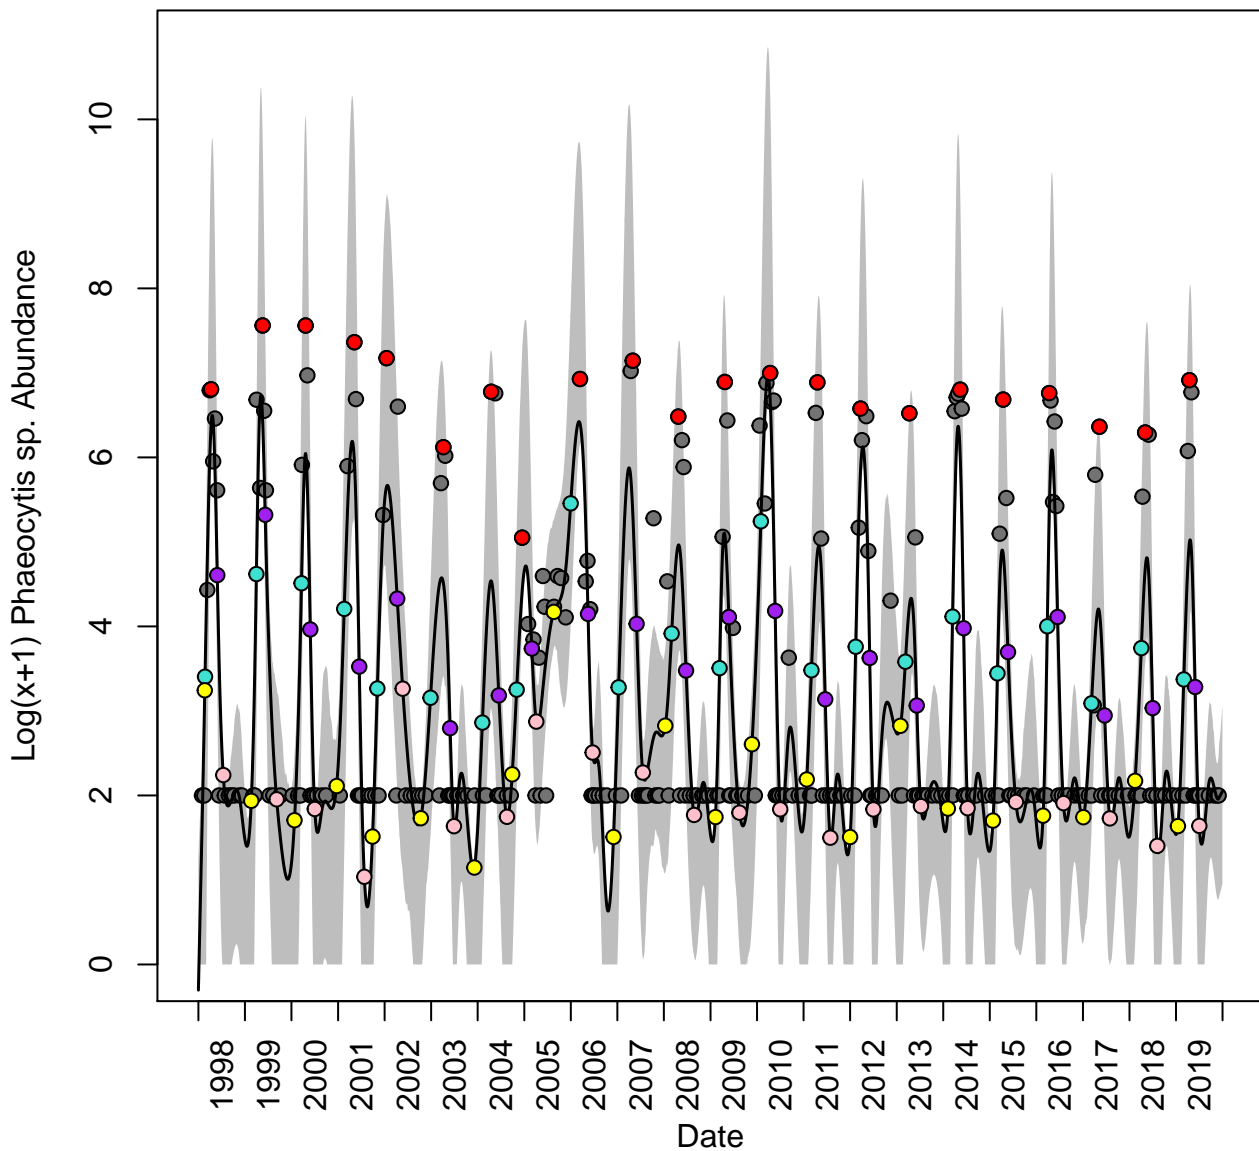



At so

Log(x+1) *Phaeocystis* sp. Abundance

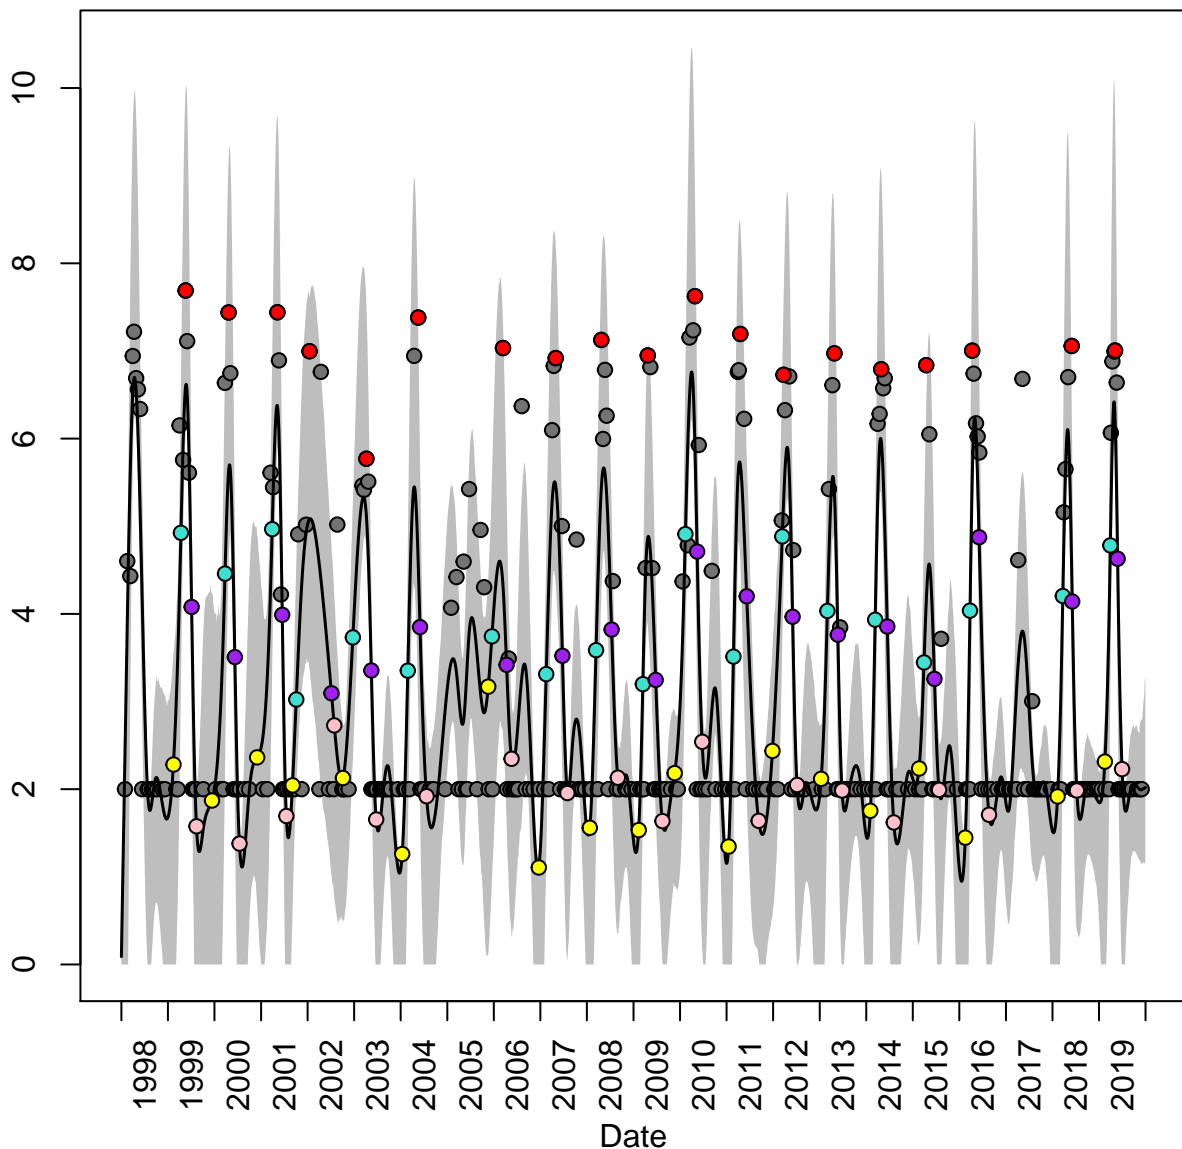

# Mimer

Log(x+1) Phaeocystis sp. Abundance

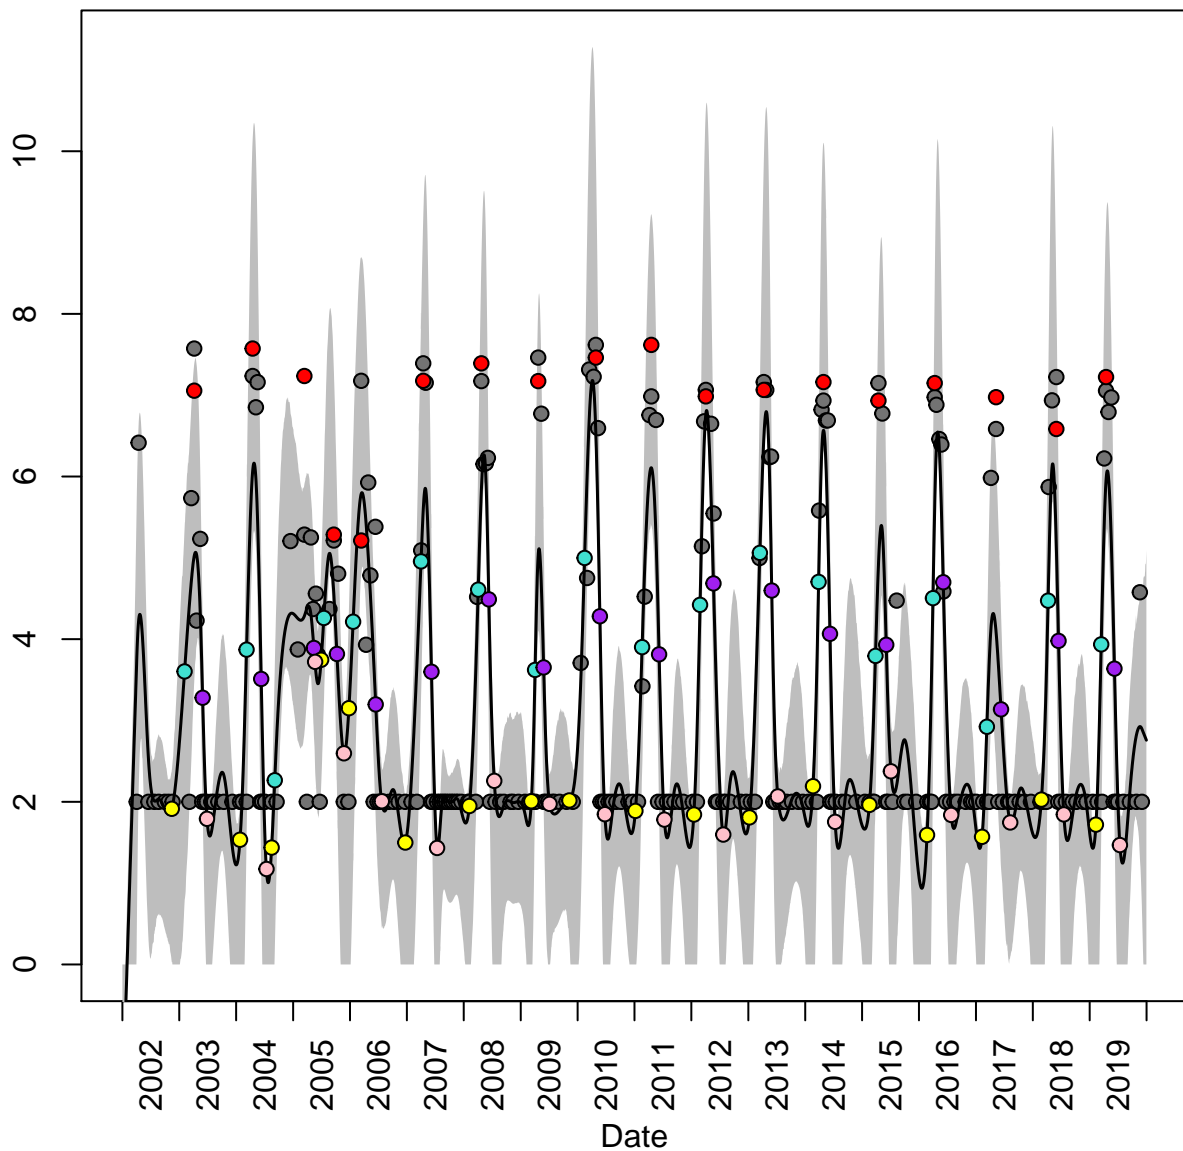

# Bif

Log(x+1) Phaeocystis sp. Abundance

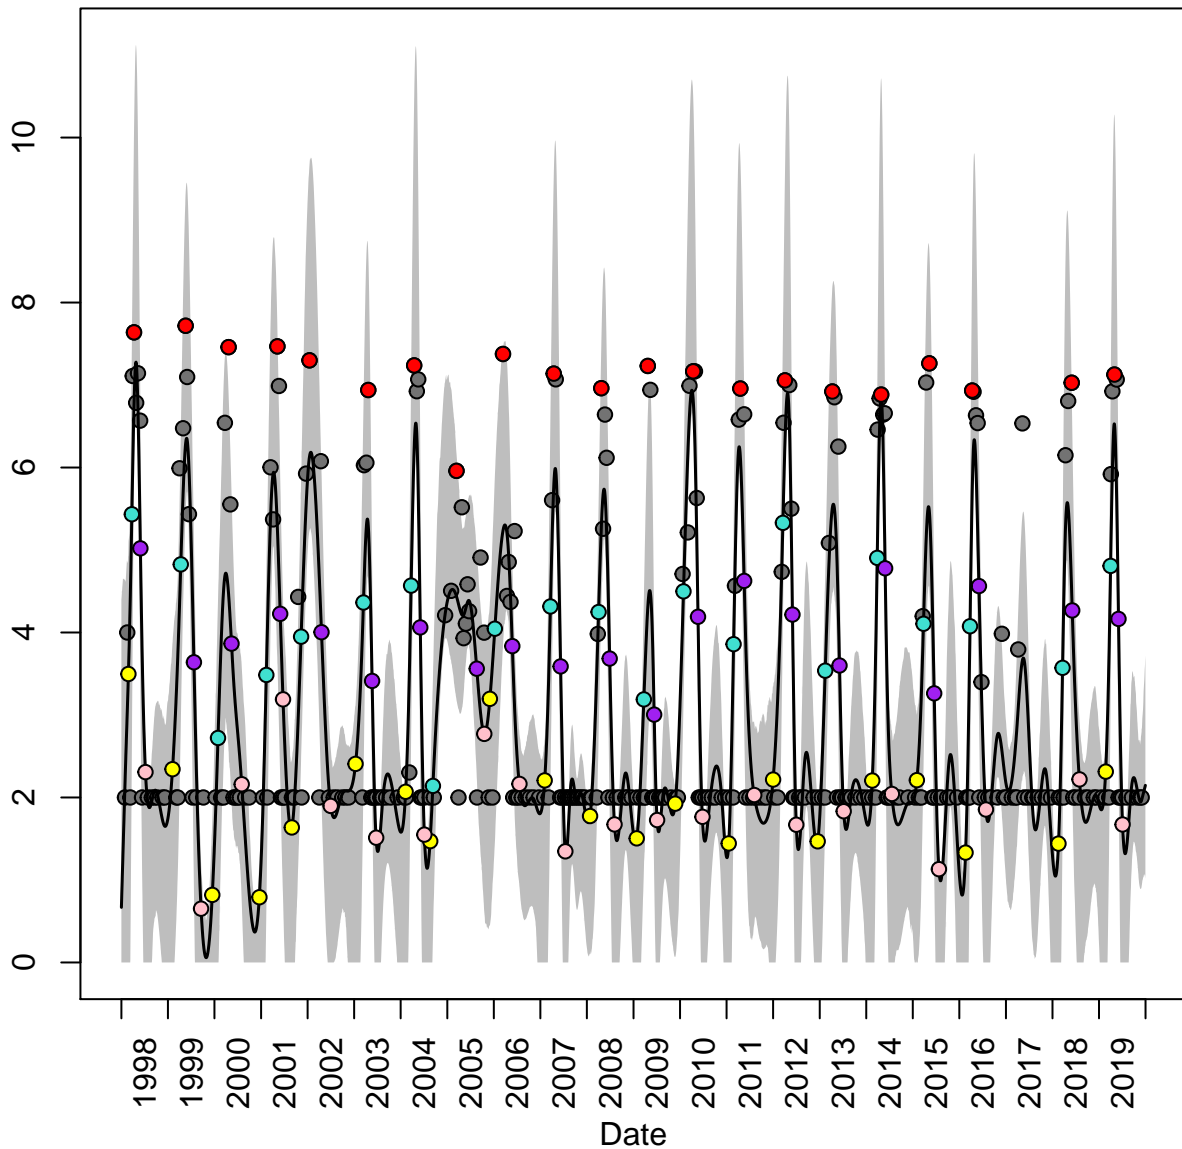

Supplement: s1 [file s1]
