# Supplementary figures and images for: Environmental Impact on Harmful Species Pseudo-nitzschia spp. and Phaeocystis globosa Phenology and Niche
Source: MDPI journal article supplement (doi:10.3390/jmse10020174), 2022-01-27

Phaeocystis

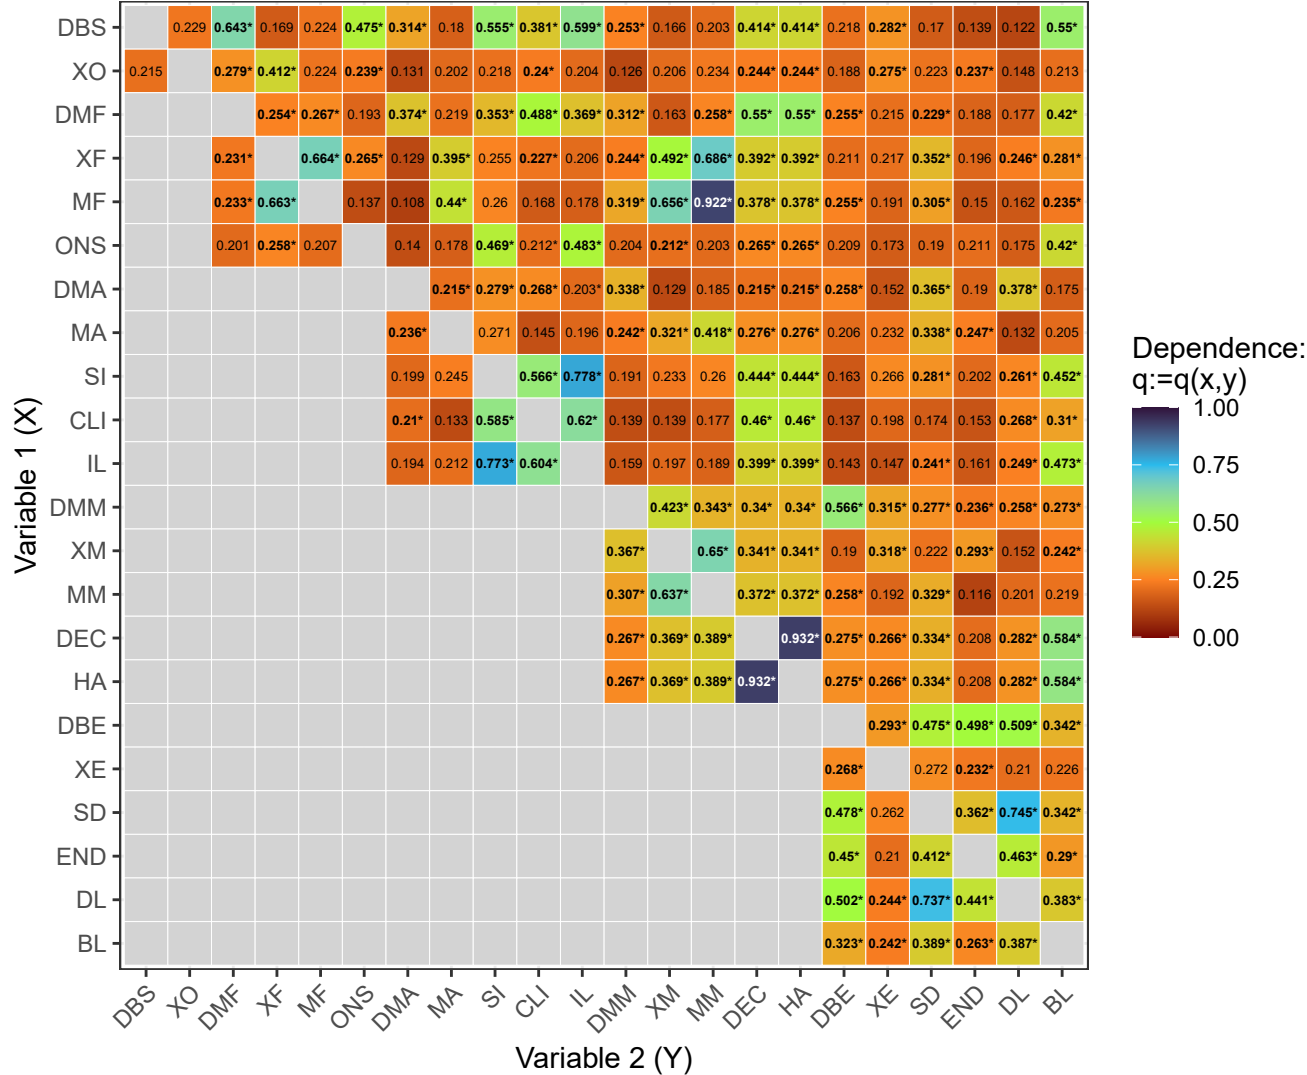

# Pseudo-nitzschia

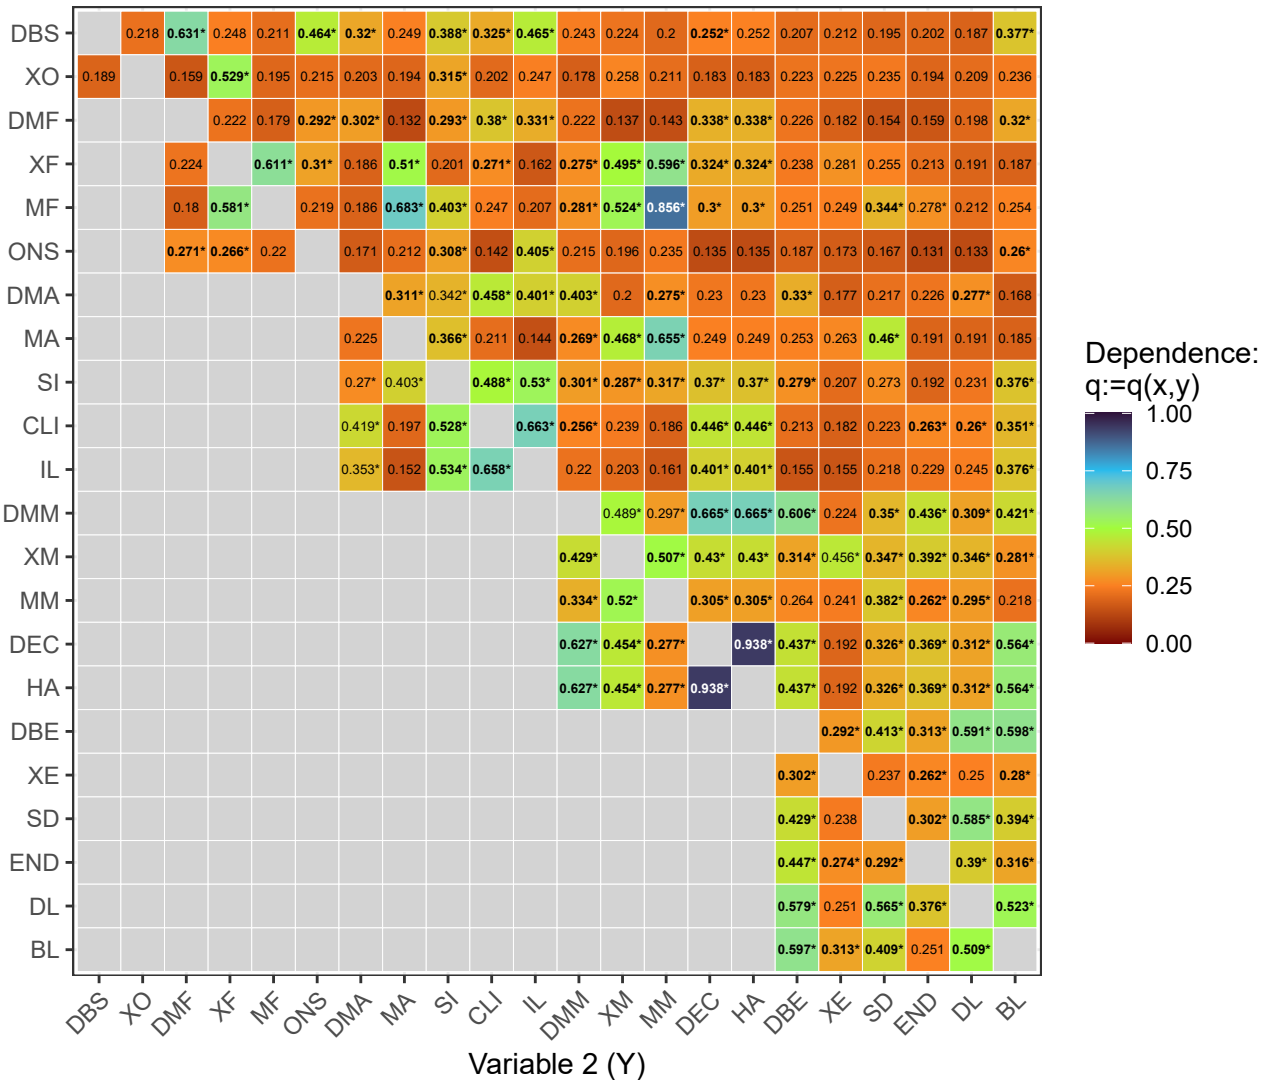

Supplement: s1 [file s1]
